# Supplementary material for: Parent Attributions of Ambiguous Symptoms in Their Children: A Preliminary Measure Validation in Parents of Children with Chronic Pain
Source: PubMed Central journal article supplement (PMC6025587; doi:10.3390/children5060076), 2018-06-13
Supplement: children-05-00076-s001.pdf [file children-05-00076-s001.pdf]

## Supplementary Materials

**Table S1.** SIQ-PR item means and standard deviations.

| Item                                                                                              | M (SD)      |
|---------------------------------------------------------------------------------------------------|-------------|
| <b>1. If my child had a <i>prolonged headache</i>, I would probably think that it is because:</b> |             |
| He/she is emotionally upset                                                                       | 0.84 (0.81) |
| There is something wrong with his/her muscles, nerves, or brain                                   | 0.94 (1.02) |
| A loud noise, bright light or something else irritated him/her                                    | 0.82 (0.93) |
| <b>2. If my child was <i>sweating a lot</i>...</b>                                                |             |
| He/she must have a fever or infection                                                             | 1.06 (1.05) |
| He/she is anxious or nervous                                                                      | 0.72 (0.84) |
| The room is too warm, he/she is overdressed or working too hard                                   | 1.84 (0.95) |
| <b>3. If my child got <i>dizzy all of a sudden</i>...</b>                                         |             |
| There is something wrong with his/her heart or blood pressure                                     | 0.60 (0.91) |
| He/she is not eating enough or got up too quickly                                                 | 1.85 (0.89) |
| He/she must be under a lot of stress                                                              | 0.77 (0.88) |
| <b>4. If my child noticed his/her <i>mouth was dry</i>...</b>                                     |             |
| He/she must be scared or anxious about something                                                  | 0.46 (0.73) |
| He/she needs to drink more liquids                                                                | 2.33 (0.77) |
| There is something wrong with his/her salivary glands                                             | 0.06 (0.24) |
| <b>5. If my child felt his/her <i>heart pounding</i>...</b>                                       |             |
| He/she has exerted him/herself or drunk a lot of caffeinated beverages                            | 1.63 (1.05) |
| He/she must be really excited or afraid                                                           | 1.65 (0.91) |
| There must be something wrong with his/her heart                                                  | 0.25 (0.61) |
| <b>6. If my child felt <i>fatigued</i>...</b>                                                     |             |
| He/she is emotionally exhausted or discouraged                                                    | 1.31 (1.01) |
| He/she has been over-exerting him/herself or not exercising enough                                | 1.65 (0.99) |
| He/she is anemic or his/her blood is weak                                                         | 0.25 (0.57) |
| <b>7. If my child noticed his/her <i>hand trembling</i>...</b>                                    |             |
| He/she might have some sort of neurological problem                                               | 0.49 (0.84) |
| He/she is very nervous                                                                            | 1.27 (0.97) |
| He/she has tired the muscle in his/her hand                                                       | 1.11 (1.01) |
| <b>8. If my child had <i>trouble sleeping</i>...</b>                                              |             |
| Some kind of pain or physical discomfort is keeping him/her awake                                 | 1.85 (0.99) |
| He/she is not tired or had too much caffeine                                                      | 0.99 (0.96) |
| He/she is worrying too much or must be nervous about something                                    | 1.51 (0.93) |
| <b>9. If my child's <i>stomach was upset</i>...</b>                                               |             |
| He/she has worried him/herself sick                                                               | 0.84 (0.91) |
| He/she has the flu or stomach irritation                                                          | 1.48 (0.87) |
| He/she has had something to eat that did not agree with him/her                                   | 1.72 (0.87) |
| <b>10. If my child had <i>lost his/her appetite</i>...</b>                                        |             |
| He/she has been eating too much or his/her body doesn't need as much food as before               | 0.91 (0.98) |
| He/she is worrying so much that food just doesn't taste good anymore                              | 0.58 (0.79) |
| He/she has some stomach or intestinal problem                                                     | 1.13 (1.01) |
| <b>11. If my child had a <i>hard time catching his/her breath</i>...</b>                          |             |
| His/her lungs are congesting from infection or irritation                                         | 0.78 (0.93) |
| The room is stuffy or there is too                                                                | 0.75 (0.85) |
| He/she is over-excited or anxious                                                                 | 1.01 (0.93) |
| <b>12. If my child noticed <i>numbness or tingling in his/her hands or feet</i>...</b>            |             |
| He/she is under emotional stress                                                                  | 0.46 (0.77) |
| There is something wrong with his/her blood circulation                                           | 0.82 (0.91) |
| He/she is cold or his/her hand went to sleep                                                      | 1.70 (0.99) |
| <b>13. If my child was <i>constipated or irregular</i>...</b>                                     |             |
| There is not enough fruit or fiber in his/her diet                                                | 2.09 (0.90) |
| Nervous tension is keeping him/her from being regular                                             | 0.70 (0.84) |

**Table S2.** Hierarchical stepwise regressions to confirm significant associations between parent attributions and child variables whilst controlling for child age and sex.

| Variable                           | B     | SE B | $\beta$ | R <sup>2</sup> Change |
|------------------------------------|-------|------|---------|-----------------------|
| Outcome: Child somatic symptoms    |       |      |         |                       |
| <i>Step 1</i>                      |       |      |         |                       |
| Child age                          | 0.96  | 0.41 | 0.13*   | 0.03*                 |
| Child sex                          | -4.43 | 2.67 | -0.09   |                       |
| <i>Step 2</i>                      |       |      |         |                       |
| Child age                          | 1.01  | 0.41 | 0.14*   | 0.04**                |
| Child sex                          | -4.61 | 2.62 | -0.10   |                       |
| Parent somatic attributions        | 0.62  | 0.18 | 0.20**  |                       |
| Outcome: Child somatic symptoms    |       |      |         |                       |
| <i>Step 1</i>                      |       |      |         |                       |
| Child age                          | 0.96  | 0.41 | 0.13*   | 0.03*                 |
| Child sex                          | -4.43 | 2.67 | -0.09   |                       |
| <i>Step 2</i>                      |       |      |         |                       |
| Child age                          | 1.04  | 0.40 | 0.14*   | 0.06***               |
| Child sex                          | -3.74 | 2.59 | -0.08   |                       |
| Parent psychological attributions  | 0.61  | 0.13 | 0.25*** |                       |
| Outcome: Child anxiety symptoms    |       |      |         |                       |
| <i>Step 1</i>                      |       |      |         |                       |
| Child age                          | -0.91 | 0.44 | -0.12*  | 0.02*                 |
| Child sex                          | -5.17 | 2.88 | -0.10   |                       |
| <i>Step 2</i>                      |       |      |         |                       |
| Child age                          | -0.89 | 0.44 | -0.11*  | 0.02**                |
| Child sex                          | -5.22 | 2.85 | -0.10   |                       |
| Parent somatic attributions        | 0.53  | 0.20 | 0.15**  |                       |
| Outcome: Child anxiety symptoms    |       |      |         |                       |
| <i>Step 1</i>                      |       |      |         |                       |
| Child age                          | -0.91 | 0.44 | -0.12*  | 0.02*                 |
| Child sex                          | -5.17 | 2.88 | -0.10   |                       |
| <i>Step 2</i>                      |       |      |         |                       |
| Child age                          | -0.80 | 0.42 | -0.10   | 0.11***               |
| Child sex                          | -4.24 | 2.72 | -0.08   |                       |
| Parent psychological attributions  | 0.88  | 0.14 | 0.34*** |                       |
| Outcome: Child depression symptoms |       |      |         |                       |
| <i>Step 1</i>                      |       |      |         |                       |
| Child age                          | 0.28  | 0.17 | 0.10    | 0.01                  |
| Child sex                          | -1.01 | 1.09 | -0.05   |                       |
| <i>Step 2</i>                      |       |      |         |                       |
| Child age                          | 0.32  | 0.16 | 0.11    | 0.11***               |
| Child sex                          | -0.66 | 1.03 | -0.04   |                       |
| Parent psychological attributions  | 0.32  | 0.05 | 0.33*** |                       |

Note. \* $p < 0.05$ ; \*\* $p < 0.01$ ; \*\*\*  $p < 0.001$
